# Supplementary material for: Co Nanoparticle-Encapsulated Nitrogen-Doped Carbon Nanotubes as an Efficient and Robust Catalyst for Electro-Oxidation of Hydrazine
Source: MDPI journal article supplement (doi:10.3390/nano11112857), 2021-10-26
Supplement: s1 [file s1]

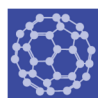

## Supplementary Materials

Hui Wang <sup>1,2</sup>, Qing Dong <sup>2</sup>, Lu Lei <sup>1,\*</sup>, Shan Ji <sup>1</sup>, Palanisamy Kannan <sup>1,\*</sup>, Palaniappan Subramanian <sup>3,\*</sup> and Amar Prasad Yadav <sup>4</sup>

<sup>1</sup> College of Biological, Chemical Sciences and Engineering, Jiaying University, Jiaying 314001, China; wangh@qust.edu.cn (H.W.); jishan@mail.zjxu.edu.cn (S.J.)

<sup>2</sup> College of Chemical Engineering, Qingdao University of Science and Technology, Qingdao 266042, China; dongqing125800@163.com

<sup>3</sup> New Technologies–Research Center, University of West Bohemia, Plzeň 30100, Czech Republic;

<sup>4</sup> Central Department of Chemistry, Tribhuvan University, Kirtipur-44613, Kathmandu, Nepal; amar2y@yahoo.com

\* Correspondence: Authors: lulei@zjxu.edu.cn (L.L.); ktpkannan@zjxu.edu.cn (P.K.); palans@ntc.zcu.cz (P.S.); Tel.: +86-19884388523 (L.L.); +86-19857386580 (P.K.); Fax: +86-573-83643264 (L.L.)

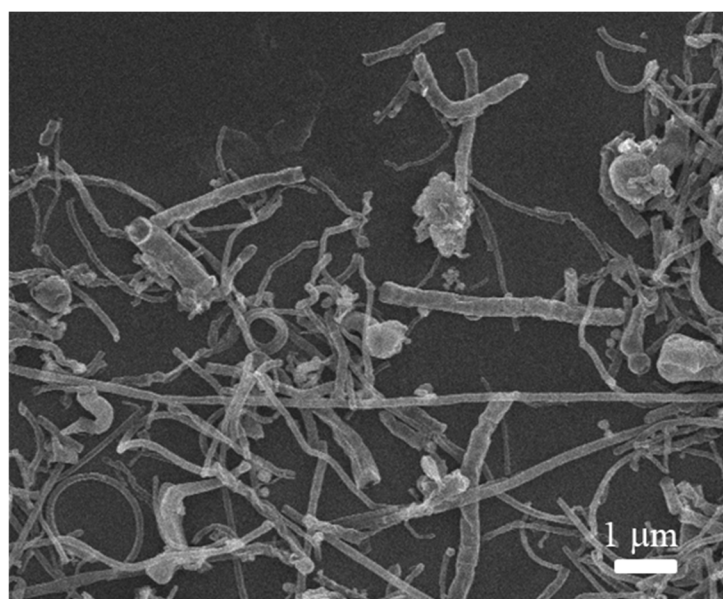

Figure S1. SEM image of NCNTs sample without Co nanoparticles.

**Citation:** Wang, H.; Dong, Q.; Lei, L.; Ji, S.; Kannan, P.; Subramanian, P.; Yadav, A.P. Co Nanoparticles Encapsulated Nitrogen-Doped Carbon Nanotubes as an Efficient and Robust Catalyst for Electro-Oxidation of Hydrazine.

*Nanomaterials* **2021**, *11*, 2857.

<https://doi.org/10.3390/nano11112857>

7

Academic Editor: Sónia Carabineiro

Received: 27 September 2021

Accepted: 23 October 2021

Published: 26 October 2021

**Publisher's Note:** MDPI stays neutral with regard to jurisdictional claims in published maps and institutional affiliations.

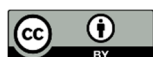

**Copyright:** © 2021 by the authors. Licensee MDPI, Basel, Switzerland. This article is an open access article distributed under the terms and conditions of the Creative Commons Attribution (CC BY) license (<http://creativecommons.org/licenses/by/4.0/>).

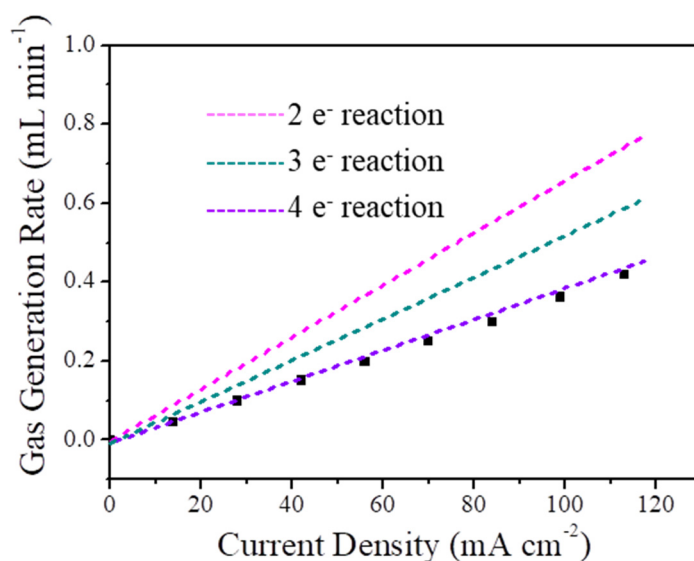

Figure S2. The variation of anodic gas generation rate as a function of current density obtained using Co@NCNTs-1 catalyst electrode.

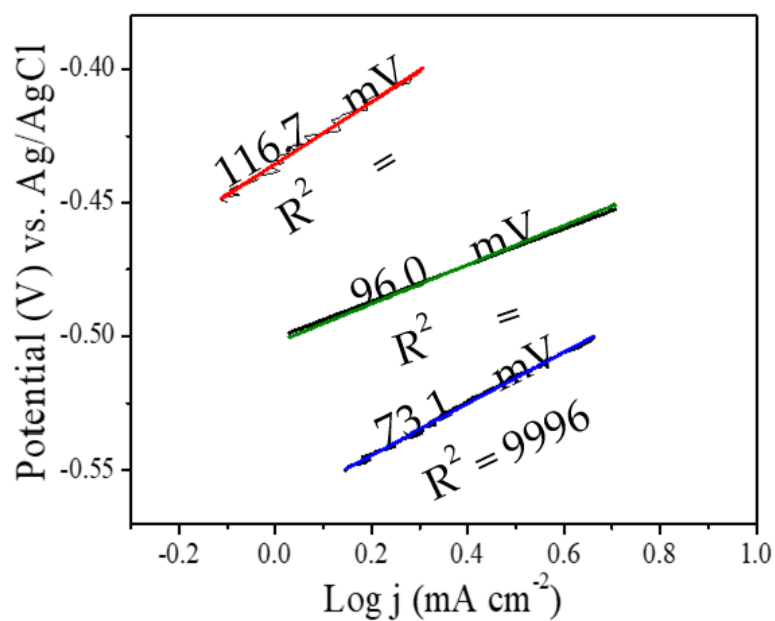

**Figure S3.** Tafel plots taken on a NCNTs (curve a), Co@NCNTs-2 (curve b), and Co@NCNTs-1 (curve c) catalyst samples modified GCE electrodes resulting from their respective LSV curves.

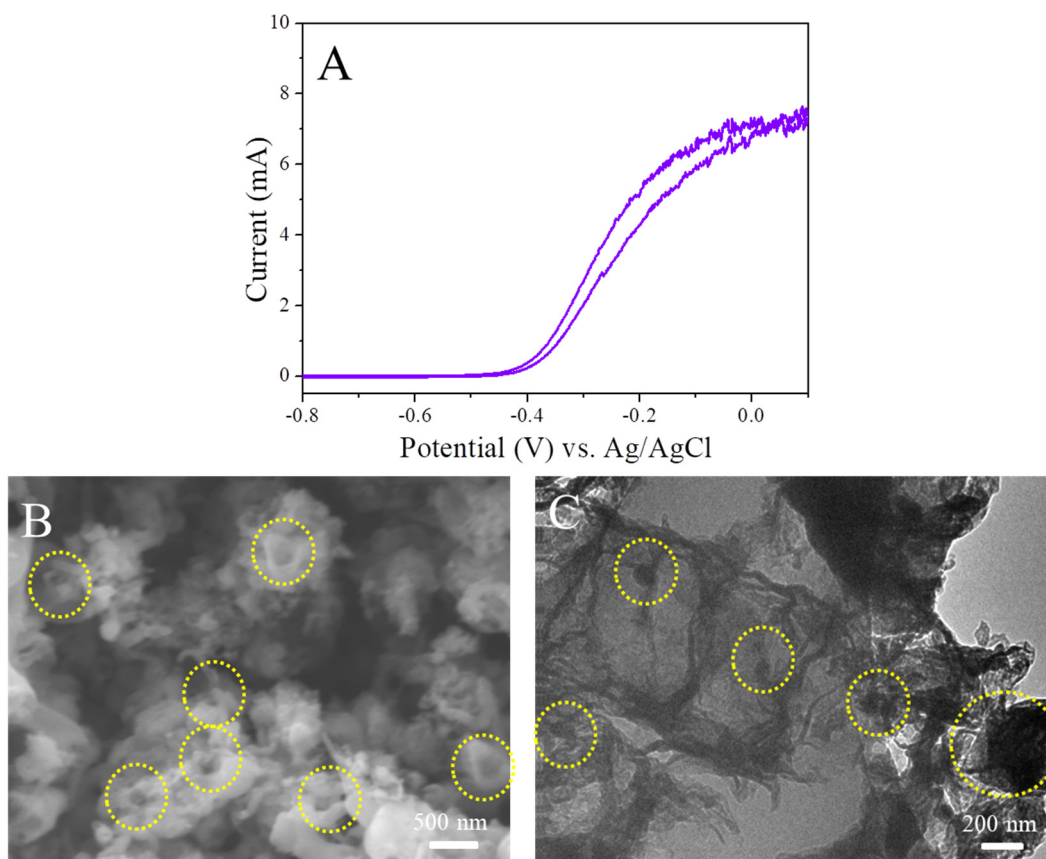

**Figure S4.** CV curve obtained for the extended chronoamperometry analysis using Co@NCNTs-1 catalyst electrode in 1.0 M NaOH solution containing 0.1 M hydrazine at a scan rate of 10 mV s<sup>-1</sup>, and corresponding SEM (B), and TEM images (C) displaying the stability characterization using Co@NCNTs-1 catalyst electrode.

**Table S1.** Comparison of BET surface area of Co@NCNTs-1 with the results reported in the literature.

| Scheme. | Name of the Nanomaterials               | BET surface area/m <sup>2</sup> g <sup>-1</sup> | References |
|---------|-----------------------------------------|-------------------------------------------------|------------|
| 1       | Co@NCNTs-1                              | 247.2                                           | This Work  |
| 2       | Fe/Fe <sub>3</sub> C@NGL-NCNT           | 210                                             | [1]        |
| 3       | PL-bio-C                                | 201.3                                           | [2]        |
| 4       | N-Fe/N/C-CNT                            | 173.9                                           | [3]        |
| 5       | ZnCo <sub>2</sub> O <sub>4</sub> /N-CNT | 159                                             | [4]        |
| 6       | MWCNT@S-N-C                             | 121                                             | [5]        |
| 7       | Fe@C-NG/NCNTs                           | 117.6                                           | [6]        |

**Table S2.** Comparison of lower-onset oxidation potential obtained at Co@NCNTs-1 catalyst electrode with recently published metal/carbon catalysts based nanomaterials.

| Scheme. | Name of the Nanomaterials                    | Onset Oxidation Potential (V) | References |
|---------|----------------------------------------------|-------------------------------|------------|
| 1       | NiO-NWs@N-HCNSs/GCE                          | +0.05                         | [7]        |
| 2       | P-CuNi <sub>2</sub> /C                       | -0.55                         | [8]        |
| 3       | h-MnFe <sub>2</sub> O <sub>4</sub> NPs/N-rGO | -0.20                         | [9]        |
| 4       | Fe@Cu-P/C                                    | -0.15                         | [10]       |
| 5       | PR/NiFe <sub>2</sub> O <sub>4</sub>          | +0.50                         | [11]       |
| 6       | Co@NCNTs                                     | -0.58                         | This Work  |

## References

- Li, J.-S.; Li, S.-L.; Tang, Y.-J.; Han, M.; Dai, Z.-H.; Bao, J.-C.; Lan, Y.-Q. Nitrogen-doped Fe/Fe<sub>3</sub>C@graphitic layer/carbon nanotube hybrids derived from MOFs: efficient bifunctional electrocatalysts for ORR and OER. *Chem. Commun.* **2015**, *51*, 2710–2713.
- Wu, Y.; Wang, Y.; Xiao, Z.; Li, M.; Ding, Y.; Qi, M.-l. Electrocatalytic oxygen reduction by a Co/Co<sub>3</sub>O<sub>4</sub>@N-doped carbon composite material derived from the pyrolysis of ZIF-67/poplar flowers. *RSC Adv.* **2021**, *11*, 2693–2700.
- Chen, P.; Zhou, T.; Xing, L.; Xu, K.; Tong, Y.; Xie, H.; Zhang, L.; Yan, W.; Chu, W.; Wu, C.; Xie, Y. Atomically Dispersed Iron–Nitrogen Species as Electrocatalysts for Bifunctional Oxygen Evolution and Reduction Reactions. *Angew. Chem. Int. Ed.* **2017**, *56*, 610–614.
- Liu, Z.-Q.; Cheng, H.; Li, N.; Ma, T. Y.; Su, Y.-Z. ZnCo<sub>2</sub>O<sub>4</sub> Quantum Dots Anchored on Nitrogen-Doped Carbon Nanotubes as Reversible Oxygen Reduction/Evolution Electrocatalysts. *Adv. Mater.* **2016**, *28*, 3777–3784.
- Zhu, Q.; Lin, L.; Jiang, Y.-F.; Xie, X.; Yuan, C.-Z.; Xu, A.-W. Carbon nanotube/S–N–C nanohybrids as high performance bifunctional electrocatalysts for both oxygen reduction and evolution reactions. *New J. Chem.* **2015**, *39*, 6289–6296.
- Wang, Q.; Lei, Y.; Chen, Z.; Wu, N.; Wang, Y.; Wang, B.; Wang, Y. Fe/Fe<sub>3</sub>C@C nanoparticles encapsulated in N-doped graphene–CNTs framework as an efficient bifunctional oxygen electrocatalyst for robust rechargeable Zn–air batteries. *J. Mater. Chem. A* **2018**, *6*, 516–526.
- Taghaddosi, S.; Rezaee, S.; Shahrokhian, S. Facile synthesis of N-doped hollow carbon nanospheres wrapped with transition metal oxides nanostructures as non-precious catalysts for the electro-oxidation of hydrazine. *J. Electroanal. Chem.* **2020**, *873*, 114437.
- Wang, W.; Wang, Y.; Liu, S.; Yahia, M.; Dong, Y.; Lei, Z. Carbon-supported phosphatized CuNi nanoparticle catalysts for hydrazine electrooxidation. *Int. J. Hydrog. Energy* **2019**, *44*, 10637–10645.

9. Khilari, S.; Pradhan, D. MnFe<sub>2</sub>O<sub>4</sub>@nitrogen-doped reduced graphene oxide nanohybrid: an efficient bifunctional electrocatalyst for anodic hydrazine oxidation and cathodic oxygen reduction. *Catal. Sci. Technol.* **2017**, *7*, 5920–5931.
10. Wang, Y.; Liu, X.; Tan, T.; Ren, Z.; Lei, Z.; Wang, W. A phosphatized pseudo-core-shell Fe@Cu-P/C electrocatalyst for efficient hydrazine oxidation reaction. *J. Alloys Compd.* **2019**, *787*, 104–111.
11. Lashkenari, M. S.; Shahrokhi, B.; Ghorbani, M.; falah, J.; Rostami, H. Polyrhodanine/NiFe<sub>2</sub>O<sub>4</sub> nanocomposite: A novel electrocatalyst for hydrazine oxidation reaction. *Int. J. Hydrog. Energy* **2018**, *43*, 11244–11252.
